# Supplementary material for: Assay System for Simultaneous Detection of SARS-CoV-2 and Other Respiratory Viruses
Source: MDPI journal article supplement (doi:10.3390/diagnostics11061084), 2021-06-13
Supplement: s1 [file s1]

**Table S1.** Eight strains of different lineages of SARS-CoV-2 used to evaluate the analytical specificity

| Company   | Cat No. | Lineage | Description    | 2019-nCoV  | STANDARD M | SC2FabR    | Comment |
|-----------|---------|---------|----------------|------------|------------|------------|---------|
| NCCP      | 43381   | B.1.1.7 | United Kingdom | SARS-CoV-2 | SARS-CoV-2 | SARS-CoV-2 | Match   |
|           | 43382   | B.1.351 | South Africa   | SARS-CoV-2 | SARS-CoV-2 | SARS-CoV-2 | Match   |
|           | 43383   | P.2     | Brazil         | SARS-CoV-2 | SARS-CoV-2 | SARS-CoV-2 | Match   |
|           | 43384   | B.1.427 | USA (CA)       | SARS-CoV-2 | SARS-CoV-2 | SARS-CoV-2 | Match   |
|           | 43385   | B.1.429 | USA (CA)       | SARS-CoV-2 | SARS-CoV-2 | SARS-CoV-2 | Match   |
|           | 43386   | B.1.525 | International  | SARS-CoV-2 | SARS-CoV-2 | SARS-CoV-2 | Match   |
|           | 43387   | B.1.526 | USA (NY)       | SARS-CoV-2 | SARS-CoV-2 | SARS-CoV-2 | Match   |
| Twist Bio | 79683   | P.1     | Brazil         | SARS-CoV-2 | SARS-CoV-2 | SARS-CoV-2 | Match   |

Strain description, cited by the PANGO lineages from which the SARS-CoV-2 strain was acquired, is shown. Abbreviations: SARS-CoV-2, severe acute respiratory syndrome-related coronavirus 2; NCCP, National Culture Collection for pathogens.

**Table S2.** Eighteen samples used to evaluate the clinical performance of the kit for simultaneous detection of co-infection

| Sample | 2019-nCoV  | RP1           | SC2FabR           | Comment |
|--------|------------|---------------|-------------------|---------|
| A      | SARS-CoV-2 | Flu A-H1pdm09 | SARS-CoV-2, Flu A | Match   |
| B      | SARS-CoV-2 | Flu A-H1pdm09 | SARS-CoV-2, Flu A | Match   |
| C      | SARS-CoV-2 | RSV A         | SARS-CoV-2, RSV   | Match   |
| D      | SARS-CoV-2 | RSV A         | SARS-CoV-2, RSV   | Match   |
| E      | SARS-CoV-2 | -             | SARS-CoV-2        | Match   |
| F      | SARS-CoV-2 | -             | SARS-CoV-2        | Match   |
| G      | SARS-CoV-2 | -             | SARS-CoV-2        | Match   |
| H      | SARS-CoV-2 | -             | SARS-CoV-2        | Match   |
| I      | SARS-CoV-2 | -             | SARS-CoV-2        | Match   |
| J      | SARS-CoV-2 | -             | SARS-CoV-2        | Match   |
| K      | SARS-CoV-2 | -             | SARS-CoV-2        | Match   |
| L      | SARS-CoV-2 | -             | SARS-CoV-2        | Match   |
| M      | SARS-CoV-2 | -             | SARS-CoV-2        | Match   |
| N      | SARS-CoV-2 | -             | SARS-CoV-2        | Match   |
| O      | SARS-CoV-2 | -             | SARS-CoV-2        | Match   |
| P      | SARS-CoV-2 | -             | SARS-CoV-2        | Match   |
| Q      | SARS-CoV-2 | -             | SARS-CoV-2        | Match   |
| R      | SARS-CoV-2 | -             | SARS-CoV-2        | Match   |

Abbreviations: SARS-CoV-2, severe acute respiratory syndrome-related coronavirus 2; Flu A-H1pdm09, influenza A virus subtype H1pdm09; RSV, respiratory syncytial virus.
